# Supplementary material
Source: publisher site journal article supplement (https://www.dovepress.com/article/258642)
Supplement: Supplementary file 1 [file get_supplementary_file.php]

Table S1 Clinical characteristics of POLE mutations in endometrial carcinomas in the SHMIH cohort

| Indicators | Group | Wild type | POLE mutation | POLE mutated (%) | Chi-Square Test P-value |
| --- | --- | --- | --- | --- | --- |
|  |  |  |  |  |  |
| Age | >= 60 | 133 | 9 | 6.34 | 0.604 |
|  | < 60 | 300 | 25 | 7.69 |  |
|  |  |  |  |  |  |
| Clinical stage | I | 363 | 25 | 6.44 | 0.275b |
|  | II | 32 | 5 | 13.51 |  |
|  | III | 34 | 4 | 10.53 |  |
|  | IV | 4 | 0 | 0.00 |  |
|  |  |  |  |  |  |
| Grade | 1 | 302 | 19 | 5.94 | 0.270b |
|  | 2 | 52 | 6 | 10.34 |  |
|  | 3 | 56 | 7 | 11.29 |  |
|  | Mixed | 11 | 2 | 15.38 |  |
|  |  |  |  |  |  |
| Histology | Endometrioid | 371 | 27 | 6.78 | 0.509b |
|  | Serous | 30 | 4 | 11.76 |  |
|  | Clear cell | 6 | 1 | 14.29 |  |
|  | Undifferentiated | 1 | 0 | 0.00 |  |
|  | Mixed carcinomas | 12 | 1 | 7.69 |  |
|  | carcinosarcoma | 13 | 1 | 7.14 |  |
|  |  |  |  |  |  |
| Treatment | No Treatment | 237 | 14 | 5.58 | 0.029a |
|  | Chem. | 71 | 4 | 5.33 |  |
|  | Radia. | 50 | 3 | 5.66 |  |
|  | Both | 75 | 13 | 14.77 |  |

a. Corrected P-value; b. Fisher’s exact test p-value
